# Supplementary material for: Bioinformatics and Experimental Analyses Reveal NFIC as an Upstream Transcriptional Regulator for Ischemic Cardiomyopathy
Source: MDPI journal article supplement (doi:10.3390/genes13061051), 2022-06-13
Supplement: s1 [file s1]

**Table S1** GSE120852 sample information

| Group     | GEO Accession | Organism     | Platform ID | Disease state                     | Tissue |
|-----------|---------------|--------------|-------------|-----------------------------------|--------|
| NF_LV1    | GSM3417081    | Homo sapiens | GPL16791    | normal control                    | heart  |
| NF_LV2    | GSM3417082    | Homo sapiens | GPL16791    | normal control                    | heart  |
| NF_LV3    | GSM3417083    | Homo sapiens | GPL16791    | normal control                    | heart  |
| NF_LV4    | GSM3417084    | Homo sapiens | GPL16791    | normal control                    | heart  |
| NF_LV5    | GSM3417085    | Homo sapiens | GPL16791    | normal control                    | heart  |
| LV-HF_LV1 | GSM3417086    | Homo sapiens | GPL16791    | end-stage ischemic cardiomyopathy | heart  |
| LV-HF_LV2 | GSM3417087    | Homo sapiens | GPL16791    | end-stage ischemic cardiomyopathy | heart  |
| LV-HF_LV3 | GSM3417088    | Homo sapiens | GPL16791    | end-stage ischemic cardiomyopathy | heart  |
| LV-HF_LV4 | GSM3417089    | Homo sapiens | GPL16791    | end-stage ischemic cardiomyopathy | heart  |
| LV-HF_LV5 | GSM3417090    | Homo sapiens | GPL16791    | end-stage ischemic cardiomyopathy | heart  |

**Table S2** GSE55296 sample information

| Group          | GEO Accession | Organism     | Platform ID | Disease state  | Tissue |
|----------------|---------------|--------------|-------------|----------------|--------|
| Ischemic rep1  | GSM1333746    | Homo sapiens | GPL16288    | ischemic       | heart  |
| Ischemic rep2  | GSM1333748    | Homo sapiens | GPL16288    | ischemic       | heart  |
| Ischemic rep3  | GSM1333750    | Homo sapiens | GPL16288    | ischemic       | heart  |
| Ischemic rep4  | GSM1333755    | Homo sapiens | GPL16288    | ischemic       | heart  |
| Ischemic rep5  | GSM1333758    | Homo sapiens | GPL16288    | ischemic       | heart  |
| Ischemic rep6  | GSM1333759    | Homo sapiens | GPL16288    | ischemic       | heart  |
| Ischemic rep7  | GSM1333760    | Homo sapiens | GPL16288    | ischemic       | heart  |
| Ischemic rep8  | GSM1333761    | Homo sapiens | GPL16288    | ischemic       | heart  |
| Ischemic rep9  | GSM1333763    | Homo sapiens | GPL16288    | ischemic       | heart  |
| Ischemic rep10 | GSM1333764    | Homo sapiens | GPL16288    | ischemic       | heart  |
| Ischemic rep11 | GSM1333766    | Homo sapiens | GPL16288    | ischemic       | heart  |
| Ischemic rep12 | GSM1333769    | Homo sapiens | GPL16288    | ischemic       | heart  |
| Ischemic rep13 | GSM1333775    | Homo sapiens | GPL16288    | ischemic       | heart  |
| Control rep1   | GSM1333749    | Homo sapiens | GPL16288    | normal control | heart  |
| Control rep2   | GSM1333751    | Homo sapiens | GPL16288    | normal control | heart  |
| Control rep3   | GSM1333752    | Homo sapiens | GPL16288    | normal control | heart  |
| Control rep4   | GSM1333753    | Homo sapiens | GPL16288    | normal control | heart  |
| Control rep5   | GSM1333754    | Homo sapiens | GPL16288    | normal control | heart  |
| Control rep6   | GSM1333757    | Homo sapiens | GPL16288    | normal control | heart  |
| Control rep7   | GSM1333762    | Homo sapiens | GPL16288    | normal control | heart  |
| Control rep8   | GSM1333770    | Homo sapiens | GPL16288    | normal control | heart  |
| Control rep9   | GSM1333771    | Homo sapiens | GPL16288    | normal control | heart  |
| Control rep10  | GSM1333774    | Homo sapiens | GPL16288    | normal control | heart  |

**Table S3** GSE1869 sample information

| Group  | GEO Accession | Organism     | Platform ID | Disease state           | Tissue |
|--------|---------------|--------------|-------------|-------------------------|--------|
| N1     | GSM33108      | Homo sapiens | GPL96       | normal control          | heart  |
| N22    | GSM33109      | Homo sapiens | GPL96       | normal control          | heart  |
| N26    | GSM33110      | Homo sapiens | GPL96       | normal control          | heart  |
| N27    | GSM33111      | Homo sapiens | GPL96       | normal control          | heart  |
| N28    | GSM33112      | Homo sapiens | GPL96       | normal control          | heart  |
| N29    | GSM33113      | Homo sapiens | GPL96       | normal control          | heart  |
| T1013i | GSM33116      | Homo sapiens | GPL96       | ischemic cardiomyopathy | heart  |
| T1015i | GSM33117      | Homo sapiens | GPL96       | ischemic cardiomyopathy | heart  |
| T1017i | GSM33118      | Homo sapiens | GPL96       | ischemic cardiomyopathy | heart  |
| TEx1i  | GSM33119      | Homo sapiens | GPL96       | ischemic cardiomyopathy | heart  |
| TEx9i  | GSM33120      | Homo sapiens | GPL96       | ischemic cardiomyopathy | heart  |

|        |          |              |       |                         |       |
|--------|----------|--------------|-------|-------------------------|-------|
| TEx10i | GSM33121 | Homo sapiens | GPL96 | ischemic cardiomyopathy | heart |
| TEx15i | GSM33122 | Homo sapiens | GPL96 | ischemic cardiomyopathy | heart |

**Table S4** The DEGs list screened by the strict cutoff (p value < 0.05 and | (log2FC) | ≥ 1)

| Ensembl gene ID | log2FC      | p value     |
|-----------------|-------------|-------------|
| ENSG00000212901 | 1.661253363 | 9.48129E-06 |
| ENSG00000039537 | 1.089126636 | 0.000145125 |
| ENSG00000147257 | 1.743008369 | 0.000127034 |
| ENSG00000161905 | 1.430983226 | 9.03449E-05 |
| ENSG00000176194 | 1.999963173 | 0.000147315 |
| ENSG00000086289 | 1.404957629 | 0.000193605 |
| ENSG00000062282 | 1.055794141 | 0.000223474 |
| ENSG00000244682 | 2.694995426 | 0.000222836 |
| ENSG00000112164 | 1.339457951 | 0.000674804 |
| ENSG00000184566 | 1.200758974 | 0.000673207 |
| ENSG00000153162 | 1.015508231 | 0.001056646 |
| ENSG00000204366 | 1.581595929 | 0.00105809  |
| ENSG00000163218 | 1.094032133 | 0.001152182 |
| ENSG00000164342 | 1.129500942 | 0.00115174  |
| ENSG00000247121 | 2.063603443 | 0.003299009 |
| ENSG00000122756 | 1.250479168 | 0.003347586 |
| ENSG00000240403 | 1.71385305  | 0.003371425 |
| ENSG00000132881 | 1.236867017 | 0.003881255 |
| ENSG00000204116 | 1.277705118 | 0.003826414 |
| ENSG00000111291 | 1.151459429 | 0.004047506 |
| ENSG00000154080 | 1.390350001 | 0.004269164 |
| ENSG00000171823 | 1.145312112 | 0.004393035 |
| ENSG00000102466 | 1.183852174 | 0.005040681 |
| ENSG00000168421 | 1.405219545 | 0.005550407 |
| ENSG00000182185 | 1.199052819 | 0.005704814 |
| ENSG00000100462 | 1.238567896 | 0.006403048 |
| ENSG00000116981 | 1.208893561 | 0.007261497 |
| ENSG00000122224 | 1.629745006 | 0.006585548 |
| ENSG00000143452 | 1.523416532 | 0.00673213  |
| ENSG00000168079 | 1.012075818 | 0.007039748 |
| ENSG00000174946 | 1.687893174 | 0.007691371 |
| ENSG00000228672 | 1.043681933 | 0.006808447 |
| ENSG00000203709 | 1.61705551  | 0.008330651 |
| ENSG00000112837 | 1.055173983 | 0.008972498 |
| ENSG00000198734 | 1.16437923  | 0.008894326 |
| ENSG00000162877 | 1.442209413 | 0.009763193 |
| ENSG00000143252 | 1.018546617 | 0.010019614 |
| ENSG00000170075 | 2.021516465 | 0.009925229 |
| ENSG00000138400 | 1.071592717 | 0.010289782 |
| ENSG00000167447 | 1.045388716 | 0.012716455 |
| ENSG00000169860 | 1.196107369 | 0.010660189 |
| ENSG00000244734 | 1.178443701 | 0.012541355 |
| ENSG00000163751 | 1.464288467 | 0.013372974 |
| ENSG00000174885 | 1.685479888 | 0.013001567 |
| ENSG00000254737 | 1.056606522 | 0.014582819 |
| ENSG00000007314 | 1.091135954 | 0.015014391 |
| ENSG00000144820 | 3.705568505 | 0.015796145 |

|                 |              |             |
|-----------------|--------------|-------------|
| ENSG00000172724 | 2.248072456  | 0.016674689 |
| ENSG00000100206 | 1.101281627  | 0.018743129 |
| ENSG00000109971 | 1.339433112  | 0.017217757 |
| ENSG00000178222 | 1.420519452  | 0.01818709  |
| ENSG00000181036 | 1.178921159  | 0.018418047 |
| ENSG00000183778 | 1.54125037   | 0.018880219 |
| ENSG00000215790 | 1.012823938  | 0.01779001  |
| ENSG00000101916 | 1.398707926  | 0.01936682  |
| ENSG00000135318 | 1.036252955  | 0.020642379 |
| ENSG00000099290 | 1.069728019  | 0.021979983 |
| ENSG00000114200 | 1.189086521  | 0.022378687 |
| ENSG00000152315 | 1.348051935  | 0.022277255 |
| ENSG00000156886 | 1.634715728  | 0.022731791 |
| ENSG00000223802 | 1.324603222  | 0.020925532 |
| ENSG00000186399 | 1.906029374  | 0.026942725 |
| ENSG00000107159 | 1.468611178  | 0.027528249 |
| ENSG00000108309 | 1.269123961  | 0.028821493 |
| ENSG00000214106 | 1.28053323   | 0.028711736 |
| ENSG00000261272 | 1.127114425  | 0.028835286 |
| ENSG00000204147 | 1.562923935  | 0.029282378 |
| ENSG00000229644 | 1.51295227   | 0.029410197 |
| ENSG00000116983 | 1.071468648  | 0.030025925 |
| ENSG00000172232 | 1.9493254    | 0.031999422 |
| ENSG00000125498 | 1.357829293  | 0.033333574 |
| ENSG00000160868 | 1.090270825  | 0.034018421 |
| ENSG00000180574 | 1.155111933  | 0.034239564 |
| ENSG00000182890 | 1.207463981  | 0.03480062  |
| ENSG00000081985 | 1.442707242  | 0.039261702 |
| ENSG00000117215 | 1.754995175  | 0.040677769 |
| ENSG00000125538 | 1.285285     | 0.03698161  |
| ENSG00000135903 | 1.441182307  | 0.038425626 |
| ENSG00000136682 | 1.382767748  | 0.040198558 |
| ENSG00000141665 | 1.08081984   | 0.037625579 |
| ENSG00000147255 | 1.030539747  | 0.037793584 |
| ENSG00000181333 | 1.284396971  | 0.037779205 |
| ENSG00000125910 | 1.072676106  | 0.043364726 |
| ENSG00000100298 | 1.382419604  | 0.043612324 |
| ENSG00000141433 | 1.049066077  | 0.043736678 |
| ENSG00000179593 | 1.131079493  | 0.045062603 |
| ENSG00000180549 | 1.594887969  | 0.045123564 |
| ENSG00000189013 | 1.800036381  | 0.046933811 |
| ENSG00000235531 | 1.11745342   | 0.047298484 |
| ENSG00000181781 | 1.517646508  | 0.049500503 |
| ENSG00000125740 | -3.257547079 | 1.53328E-06 |
| ENSG00000175161 | -2.071624331 | 1.97026E-05 |
| ENSG00000185022 | -1.821593264 | 3.08424E-05 |
| ENSG00000159200 | -1.002579722 | 0.000108023 |
| ENSG00000198570 | -1.503858047 | 0.000198441 |
| ENSG00000162892 | -3.76275497  | 0.000340558 |
| ENSG00000153234 | -2.024169309 | 0.000567011 |
| ENSG00000155893 | -1.144178122 | 0.000498286 |
| ENSG00000142178 | -1.098038824 | 0.000747345 |

|                 |              |             |
|-----------------|--------------|-------------|
| ENSG00000258311 | -1.27119987  | 0.000759129 |
| ENSG00000113739 | -1.35464027  | 0.000829454 |
| ENSG00000116761 | -1.69781611  | 0.000831563 |
| ENSG00000117479 | -1.146703408 | 0.000960259 |
| ENSG00000170091 | -1.763897389 | 0.00099697  |
| ENSG00000186567 | -1.453698983 | 0.001022831 |
| ENSG00000100146 | -1.297320385 | 0.001169049 |
| ENSG00000152049 | -1.045539995 | 0.001137492 |
| ENSG00000158486 | -1.275470432 | 0.001155092 |
| ENSG00000077044 | -1.044446562 | 0.001333326 |
| ENSG00000176170 | -1.523835434 | 0.001420175 |
| ENSG00000187527 | -2.079093929 | 0.001526648 |
| ENSG00000116741 | -1.049049282 | 0.00159331  |
| ENSG00000075426 | -1.059869953 | 0.001962178 |
| ENSG00000117472 | -1.200587474 | 0.001759478 |
| ENSG00000176697 | -1.163340741 | 0.001972611 |
| ENSG00000129455 | -1.582626606 | 0.002121407 |
| ENSG00000258227 | -1.367053342 | 0.002155825 |
| ENSG00000080166 | -1.821420839 | 0.002594732 |
| ENSG00000106366 | -1.880860706 | 0.002514378 |
| ENSG00000157017 | -1.000129846 | 0.002638015 |
| ENSG00000171241 | -1.329670105 | 0.002432021 |
| ENSG00000181649 | -1.770052873 | 0.002582505 |
| ENSG00000143006 | -1.382965216 | 0.003175756 |
| ENSG00000173826 | -1.31502267  | 0.002735158 |
| ENSG00000174429 | -1.409162925 | 0.003353529 |
| ENSG00000140403 | -1.051067585 | 0.003484327 |
| ENSG00000108846 | -1.617720454 | 0.003772917 |
| ENSG00000140563 | -1.470329502 | 0.003843803 |
| ENSG00000142871 | -1.442922839 | 0.003701421 |
| ENSG00000108342 | -2.19484782  | 0.004430251 |
| ENSG00000149300 | -1.467070943 | 0.004149242 |
| ENSG00000161647 | -1.028058669 | 0.004515229 |
| ENSG00000167634 | -1.21803393  | 0.004005208 |
| ENSG00000172020 | -1.237687757 | 0.004416029 |
| ENSG00000083454 | -1.191452097 | 0.004658286 |
| ENSG00000140450 | -1.063249286 | 0.004686897 |
| ENSG00000106258 | -1.024822595 | 0.005016107 |
| ENSG00000164761 | -1.695190715 | 0.005225797 |
| ENSG00000164611 | -1.52965133  | 0.00579318  |
| ENSG00000184205 | -1.026051288 | 0.005279386 |
| ENSG00000085465 | -1.030396218 | 0.005862897 |
| ENSG00000021852 | -1.441004351 | 0.006540671 |
| ENSG00000179165 | -1.129063625 | 0.007508659 |
| ENSG00000180525 | -1.106121824 | 0.007646921 |
| ENSG00000244623 | -2.229507314 | 0.008383172 |
| ENSG00000188517 | -1.177418287 | 0.008496731 |
| ENSG00000168209 | -1.358286363 | 0.008808175 |
| ENSG00000175264 | -1.073381636 | 0.008839215 |
| ENSG00000184254 | -1.156937446 | 0.00881479  |
| ENSG00000213988 | -1.254993975 | 0.008950735 |
| ENSG00000147588 | -1.017339135 | 0.009358436 |

|                 |              |             |
|-----------------|--------------|-------------|
| ENSG00000100889 | -1.089709958 | 0.009688149 |
| ENSG00000248713 | -1.195890107 | 0.00997692  |
| ENSG00000041982 | -1.321881962 | 0.011979727 |
| ENSG00000134668 | -1.275641162 | 0.012041177 |
| ENSG00000141314 | -1.114844333 | 0.012463211 |
| ENSG00000159166 | -1.031210062 | 0.01082126  |
| ENSG00000170561 | -1.340320044 | 0.012337429 |
| ENSG00000171773 | -1.381569806 | 0.012391597 |
| ENSG00000174576 | -1.680621817 | 0.010722651 |
| ENSG00000175894 | -1.39922638  | 0.01125084  |
| ENSG00000189120 | -1.903583817 | 0.011296842 |
| ENSG00000118985 | -1.141349485 | 0.013584045 |
| ENSG00000171551 | -1.632634521 | 0.01384253  |
| ENSG00000171476 | -1.065272664 | 0.015953705 |
| ENSG00000166268 | -1.397781189 | 0.01598527  |
| ENSG00000139835 | -1.16994372  | 0.01618297  |
| ENSG00000136997 | -1.053418698 | 0.016341381 |
| ENSG00000102104 | -1.048124771 | 0.01755383  |
| ENSG00000148798 | -1.684830876 | 0.018998283 |
| ENSG00000155890 | -1.013328187 | 0.018031359 |
| ENSG00000140798 | -1.257791395 | 0.020205936 |
| ENSG00000127129 | -1.695710725 | 0.020474433 |
| ENSG00000243709 | -1.811246386 | 0.02050464  |
| ENSG00000100312 | -1.382305861 | 0.02224815  |
| ENSG00000101251 | -1.922695005 | 0.021319821 |
| ENSG00000175766 | -1.095566361 | 0.023131879 |
| ENSG00000178734 | -1.022599277 | 0.022315556 |
| ENSG00000197561 | -1.251110872 | 0.021115385 |
| ENSG00000186190 | -1.240150898 | 0.02331987  |
| ENSG00000183324 | -1.222235377 | 0.023646518 |
| ENSG00000135437 | -1.153921057 | 0.023926038 |
| ENSG00000196517 | -1.063552659 | 0.025324796 |
| ENSG00000173124 | -2.152981471 | 0.026044127 |
| ENSG00000266258 | -1.16101567  | 0.028042671 |
| ENSG00000069696 | -1.095967198 | 0.028330438 |
| ENSG00000184697 | -1.743729616 | 0.02975076  |
| ENSG00000160282 | -1.029139684 | 0.030745557 |
| ENSG00000183117 | -1.034226547 | 0.031231588 |
| ENSG00000163817 | -1.014456717 | 0.032957216 |
| ENSG00000181433 | -1.314139431 | 0.033069079 |
| ENSG00000050628 | -1.197572581 | 0.033523116 |
| ENSG00000107105 | -1.373397852 | 0.041189784 |
| ENSG00000112494 | -2.200510123 | 0.040830539 |
| ENSG00000120937 | -1.73760142  | 0.036741678 |
| ENSG00000125931 | -1.127427191 | 0.037847507 |
| ENSG00000143867 | -1.025474691 | 0.040506564 |
| ENSG00000167767 | -1.522961424 | 0.036147245 |
| ENSG00000172482 | -1.075938525 | 0.040619787 |
| ENSG00000221819 | -1.30147832  | 0.038398443 |
| ENSG00000222005 | -1.031887021 | 0.041930677 |
| ENSG00000157315 | -1.211992919 | 0.04205383  |
| ENSG00000179388 | -1.035883521 | 0.043359073 |

|                 |              |             |
|-----------------|--------------|-------------|
| ENSG00000171495 | -1.475510824 | 0.045895281 |
| ENSG00000216895 | -1.072213373 | 0.046738299 |
| ENSG00000145757 | -1.241982642 | 0.048221699 |
| ENSG00000139890 | -1.152815745 | 0.04936772  |
| ENSG00000137648 | -1.119332615 | 0.049708653 |

**Table S5** The DEGs list screened by the loose cutoff (p value < 0.05 and | (log2FC) | ≥ 0.7)

| Ensembl gene ID | log2FC      | p value     |
|-----------------|-------------|-------------|
| ENSG00000212901 | 1.661253363 | 9.48129E-06 |
| ENSG00000039537 | 1.089126636 | 0.000145125 |
| ENSG00000147257 | 1.743008369 | 0.000127034 |
| ENSG00000161905 | 1.430983226 | 9.03449E-05 |
| ENSG00000176194 | 1.999963173 | 0.000147315 |
| ENSG00000197446 | 0.979810226 | 9.35355E-05 |
| ENSG00000086289 | 1.404957629 | 0.000193605 |
| ENSG00000062282 | 1.055794141 | 0.000223474 |
| ENSG00000244682 | 2.694995426 | 0.000222836 |
| ENSG00000197006 | 0.827325535 | 0.000261878 |
| ENSG00000123243 | 0.866063518 | 0.000435612 |
| ENSG00000026950 | 0.841120801 | 0.000515258 |
| ENSG00000112164 | 1.339457951 | 0.000674804 |
| ENSG00000137033 | 0.738889805 | 0.000697704 |
| ENSG00000184566 | 1.200758974 | 0.000673207 |
| ENSG00000167920 | 0.855157383 | 0.000855394 |
| ENSG00000153162 | 1.015508231 | 0.001056646 |
| ENSG00000204366 | 1.581595929 | 0.00105809  |
| ENSG00000163218 | 1.094032133 | 0.001152182 |
| ENSG00000164342 | 1.129500942 | 0.00115174  |
| ENSG00000164946 | 0.834170718 | 0.001193404 |
| ENSG00000100804 | 0.931048711 | 0.001883266 |
| ENSG00000109610 | 0.720063501 | 0.00192706  |
| ENSG00000115252 | 0.875412034 | 0.002022141 |
| ENSG00000161955 | 0.945276473 | 0.002044207 |
| ENSG00000172164 | 0.943122013 | 0.001890546 |
| ENSG00000181191 | 0.888123569 | 0.00245624  |
| ENSG00000116663 | 0.736494729 | 0.003021973 |
| ENSG00000138449 | 0.897181798 | 0.003248234 |
| ENSG00000158270 | 0.804002082 | 0.002998482 |
| ENSG00000168778 | 0.736644872 | 0.003274612 |
| ENSG00000247121 | 2.063603443 | 0.003299009 |
| ENSG00000122756 | 1.250479168 | 0.003347586 |
| ENSG00000240403 | 1.71385305  | 0.003371425 |
| ENSG00000108733 | 0.905444707 | 0.003534478 |
| ENSG00000132881 | 1.236867017 | 0.003881255 |
| ENSG00000204116 | 1.277705118 | 0.003826414 |
| ENSG00000111291 | 1.151459429 | 0.004047506 |
| ENSG00000154080 | 1.390350001 | 0.004269164 |
| ENSG00000164307 | 0.713329866 | 0.004094274 |
| ENSG00000171823 | 1.145312112 | 0.004393035 |
| ENSG00000242265 | 0.796439464 | 0.004510037 |
| ENSG00000102466 | 1.183852174 | 0.005040681 |
| ENSG00000131374 | 0.885930038 | 0.004921476 |

|                 |             |             |
|-----------------|-------------|-------------|
| ENSG00000111674 | 0.784948048 | 0.005610868 |
| ENSG00000168421 | 1.405219545 | 0.005550407 |
| ENSG00000182185 | 1.199052819 | 0.005704814 |
| ENSG00000183508 | 0.84579168  | 0.005409412 |
| ENSG00000143552 | 0.80972438  | 0.006009363 |
| ENSG00000100462 | 1.238567896 | 0.006403048 |
| ENSG00000106780 | 0.890418193 | 0.006637863 |
| ENSG00000114670 | 0.773869156 | 0.007329536 |
| ENSG00000116981 | 1.208893561 | 0.007261497 |
| ENSG00000122224 | 1.629745006 | 0.006585548 |
| ENSG00000124212 | 0.879603282 | 0.007029967 |
| ENSG00000139737 | 0.731953729 | 0.006640082 |
| ENSG00000141338 | 0.718335032 | 0.007529475 |
| ENSG00000143036 | 0.971518964 | 0.006800509 |
| ENSG00000143452 | 1.523416532 | 0.00673213  |
| ENSG00000168079 | 1.012075818 | 0.007039748 |
| ENSG00000174946 | 1.687893174 | 0.007691371 |
| ENSG00000180488 | 0.756636319 | 0.007134093 |
| ENSG00000228672 | 1.043681933 | 0.006808447 |
| ENSG00000007350 | 0.820946863 | 0.008008041 |
| ENSG00000116194 | 0.999768331 | 0.008352032 |
| ENSG00000203709 | 1.61705551  | 0.008330651 |
| ENSG00000254772 | 0.899337153 | 0.008453839 |
| ENSG00000112837 | 1.055173983 | 0.008972498 |
| ENSG00000198734 | 1.16437923  | 0.008894326 |
| ENSG00000163131 | 0.912299366 | 0.009147598 |
| ENSG00000176788 | 0.819259876 | 0.009102316 |
| ENSG00000112096 | 0.75706914  | 0.009586275 |
| ENSG00000162877 | 1.442209413 | 0.009763193 |
| ENSG00000143252 | 1.018546617 | 0.010019614 |
| ENSG00000159625 | 0.933358312 | 0.010000608 |
| ENSG00000170075 | 2.021516465 | 0.009925229 |
| ENSG00000181804 | 0.779479476 | 0.010110043 |
| ENSG00000138400 | 1.071592717 | 0.010289782 |
| ENSG00000065320 | 0.850056774 | 0.010666209 |
| ENSG00000115415 | 0.916110682 | 0.012121358 |
| ENSG00000139547 | 0.904943282 | 0.011145931 |
| ENSG00000140090 | 0.885163904 | 0.012049483 |
| ENSG00000167447 | 1.045388716 | 0.012716455 |
| ENSG00000169860 | 1.196107369 | 0.010660189 |
| ENSG00000185164 | 0.832363208 | 0.012306382 |
| ENSG00000197296 | 0.850261624 | 0.012381281 |
| ENSG00000197646 | 0.841445461 | 0.01166694  |
| ENSG00000244734 | 1.178443701 | 0.012541355 |
| ENSG00000115758 | 0.858759768 | 0.013094245 |
| ENSG00000137563 | 0.92908525  | 0.013156576 |
| ENSG00000145569 | 0.878725476 | 0.0135869   |
| ENSG00000163751 | 1.464288467 | 0.013372974 |
| ENSG00000174885 | 1.685479888 | 0.013001567 |
| ENSG00000176994 | 0.893603141 | 0.013697188 |
| ENSG00000188064 | 0.762285462 | 0.013792555 |
| ENSG00000205038 | 0.9437182   | 0.013991928 |

|                 |             |             |
|-----------------|-------------|-------------|
| ENSG00000066926 | 0.766016862 | 0.014120249 |
| ENSG00000125730 | 0.812189369 | 0.014408042 |
| ENSG00000172264 | 0.917081079 | 0.014582687 |
| ENSG00000254737 | 1.056606522 | 0.014582819 |
| ENSG00000007314 | 1.091135954 | 0.015014391 |
| ENSG00000106682 | 0.755446245 | 0.015090641 |
| ENSG00000110436 | 0.775350948 | 0.015440024 |
| ENSG00000174738 | 0.74015805  | 0.015500321 |
| ENSG00000144820 | 3.705568505 | 0.015796145 |
| ENSG00000148488 | 0.795195078 | 0.015933916 |
| ENSG00000153446 | 0.772897297 | 0.016165557 |
| ENSG00000166347 | 0.726466538 | 0.016097151 |
| ENSG00000174125 | 0.931241759 | 0.016125322 |
| ENSG00000146411 | 0.738124331 | 0.016252723 |
| ENSG00000172724 | 2.248072456 | 0.016674689 |
| ENSG00000100206 | 1.101281627 | 0.018743129 |
| ENSG00000109971 | 1.339433112 | 0.017217757 |
| ENSG00000115365 | 0.818633961 | 0.01693523  |
| ENSG00000146858 | 0.821305145 | 0.017251652 |
| ENSG00000149527 | 0.752238385 | 0.017051692 |
| ENSG00000152582 | 0.923348945 | 0.017711557 |
| ENSG00000169758 | 0.90678775  | 0.017074183 |
| ENSG00000178222 | 1.420519452 | 0.01818709  |
| ENSG00000181036 | 1.178921159 | 0.018418047 |
| ENSG00000183778 | 1.54125037  | 0.018880219 |
| ENSG00000198326 | 0.837181722 | 0.018768038 |
| ENSG00000215790 | 1.012823938 | 0.01779001  |
| ENSG00000091262 | 0.772042665 | 0.019347216 |
| ENSG00000101916 | 1.398707926 | 0.01936682  |
| ENSG00000158158 | 0.726653275 | 0.019238084 |
| ENSG00000135318 | 1.036252955 | 0.020642379 |
| ENSG00000082074 | 0.900046744 | 0.022058129 |
| ENSG00000099290 | 1.069728019 | 0.021979983 |
| ENSG00000114200 | 1.189086521 | 0.022378687 |
| ENSG00000128536 | 0.77640015  | 0.022859978 |
| ENSG00000136960 | 0.70094631  | 0.022911024 |
| ENSG00000143126 | 0.782130843 | 0.021911192 |
| ENSG00000152315 | 1.348051935 | 0.022277255 |
| ENSG00000156886 | 1.634715728 | 0.022731791 |
| ENSG00000188021 | 0.757903044 | 0.021996254 |
| ENSG00000223802 | 1.324603222 | 0.020925532 |
| ENSG00000162407 | 0.748327677 | 0.023574674 |
| ENSG00000180448 | 0.713190811 | 0.023922538 |
| ENSG00000152782 | 0.753238057 | 0.025235287 |
| ENSG00000180481 | 0.844612952 | 0.025736294 |
| ENSG00000185818 | 0.893270514 | 0.025527183 |
| ENSG00000109743 | 0.722524844 | 0.026464714 |
| ENSG00000186399 | 1.906029374 | 0.026942725 |
| ENSG00000148204 | 0.733843565 | 0.027231768 |
| ENSG00000107159 | 1.468611178 | 0.027528249 |
| ENSG00000108309 | 1.269123961 | 0.028821493 |
| ENSG00000138336 | 0.767791473 | 0.028937195 |



|                 |             |             |
|-----------------|-------------|-------------|
| ENSG00000172840 | 0.719872266 | 0.029014412 |
| ENSG00000214106 | 1.28053323  | 0.028711736 |
| ENSG00000261272 | 1.127114425 | 0.028835286 |
| ENSG00000152207 | 0.972619805 | 0.029238643 |
| ENSG00000204147 | 1.562923935 | 0.029282378 |
| ENSG00000229644 | 1.51295227  | 0.029410197 |
| ENSG00000116983 | 1.071468648 | 0.030025925 |
| ENSG00000131037 | 0.857204554 | 0.030037156 |
| ENSG00000172232 | 1.9493254   | 0.031999422 |
| ENSG00000129636 | 0.71184434  | 0.032104941 |
| ENSG00000087495 | 0.837803941 | 0.032722493 |
| ENSG00000156345 | 0.748344949 | 0.032833722 |
| ENSG00000125498 | 1.357829293 | 0.033333574 |
| ENSG00000146476 | 0.743255688 | 0.035325859 |
| ENSG00000150471 | 0.761864583 | 0.035179605 |
| ENSG00000160868 | 1.090270825 | 0.034018421 |
| ENSG00000180574 | 1.155111933 | 0.034239564 |
| ENSG00000182890 | 1.207463981 | 0.03480062  |
| ENSG00000198088 | 0.818962178 | 0.035245139 |
| ENSG00000213760 | 0.744865176 | 0.034810061 |
| ENSG00000081985 | 1.442707242 | 0.039261702 |
| ENSG00000107242 | 0.850487722 | 0.040942067 |
| ENSG00000112234 | 0.701080148 | 0.036268341 |
| ENSG00000112796 | 0.909315148 | 0.037489557 |
| ENSG00000116711 | 0.816882436 | 0.037341828 |
| ENSG00000117215 | 1.754995175 | 0.040677769 |
| ENSG00000123600 | 0.702337302 | 0.036129552 |
| ENSG00000125538 | 1.285285    | 0.03698161  |
| ENSG00000135903 | 1.441182307 | 0.038425626 |
| ENSG00000136682 | 1.382767748 | 0.040198558 |
| ENSG00000137168 | 0.834793665 | 0.040678212 |
| ENSG00000138663 | 0.756322291 | 0.036541676 |
| ENSG00000141665 | 1.08081984  | 0.037625579 |
| ENSG00000147255 | 1.030539747 | 0.037793584 |
| ENSG00000167840 | 0.751580875 | 0.039611169 |
| ENSG00000169891 | 0.726199171 | 0.039604821 |
| ENSG00000181333 | 1.284396971 | 0.037779205 |
| ENSG00000213462 | 0.955756376 | 0.041242312 |
| ENSG00000153094 | 0.729309346 | 0.041897573 |
| ENSG00000164532 | 0.857992476 | 0.042018418 |
| ENSG00000206172 | 0.857580457 | 0.042170738 |
| ENSG00000125910 | 1.072676106 | 0.043364726 |
| ENSG00000100298 | 1.382419604 | 0.043612324 |
| ENSG00000141433 | 1.049066077 | 0.043736678 |
| ENSG00000179593 | 1.131079493 | 0.045062603 |
| ENSG00000180549 | 1.594887969 | 0.045123564 |
| ENSG00000143845 | 0.705241782 | 0.045256681 |
| ENSG00000163701 | 0.885354194 | 0.046191142 |
| ENSG00000086967 | 0.812162851 | 0.046771283 |
| ENSG00000189013 | 1.800036381 | 0.046933811 |
| ENSG00000235531 | 1.11745342  | 0.047298484 |
| ENSG00000119922 | 0.721280332 | 0.047864106 |

|                 |              |             |
|-----------------|--------------|-------------|
| ENSG00000181781 | 1.517646508  | 0.049500503 |
| ENSG00000125740 | -3.257547079 | 1.53328E-06 |
| ENSG00000175161 | -2.071624331 | 1.97026E-05 |
| ENSG00000185022 | -1.821593264 | 3.08424E-05 |
| ENSG00000159200 | -1.002579722 | 0.000108023 |
| ENSG00000205085 | -0.984622408 | 0.00012988  |
| ENSG00000198570 | -1.503858047 | 0.000198441 |
| ENSG00000006652 | -0.881609917 | 0.000390914 |
| ENSG00000162892 | -3.76275497  | 0.000340558 |
| ENSG00000183648 | -0.834568054 | 0.000384579 |
| ENSG00000065361 | -0.734170375 | 0.000414932 |
| ENSG00000048162 | -0.967347096 | 0.000538094 |
| ENSG00000109846 | -0.858475283 | 0.000693073 |
| ENSG00000153234 | -2.024169309 | 0.000567011 |
| ENSG00000155893 | -1.144178122 | 0.000498286 |
| ENSG00000142178 | -1.098038824 | 0.000747345 |
| ENSG00000258311 | -1.27119987  | 0.000759129 |
| ENSG00000113739 | -1.35464027  | 0.000829454 |
| ENSG00000116761 | -1.69781611  | 0.000831563 |
| ENSG00000128272 | -0.998749847 | 0.000788554 |
| ENSG00000144655 | -0.983291446 | 0.000849509 |
| ENSG00000146426 | -0.999336605 | 0.000895937 |
| ENSG00000117479 | -1.146703408 | 0.000960259 |
| ENSG00000139998 | -0.874418537 | 0.001030119 |
| ENSG00000170091 | -1.763897389 | 0.00099697  |
| ENSG00000186567 | -1.453698983 | 0.001022831 |
| ENSG00000100146 | -1.297320385 | 0.001169049 |
| ENSG00000152049 | -1.045539995 | 0.001137492 |
| ENSG00000158486 | -1.275470432 | 0.001155092 |
| ENSG00000077044 | -1.044446562 | 0.001333326 |
| ENSG00000173334 | -0.897439056 | 0.001390605 |
| ENSG00000176170 | -1.523835434 | 0.001420175 |
| ENSG00000187527 | -2.079093929 | 0.001526648 |
| ENSG00000116741 | -1.049049282 | 0.00159331  |
| ENSG00000075426 | -1.059869953 | 0.001962178 |
| ENSG00000117472 | -1.200587474 | 0.001759478 |
| ENSG00000124831 | -0.744294151 | 0.002030605 |
| ENSG00000145016 | -0.849579111 | 0.002000921 |
| ENSG00000176697 | -1.163340741 | 0.001972611 |
| ENSG00000185736 | -0.820087198 | 0.001948748 |
| ENSG00000129455 | -1.582626606 | 0.002121407 |
| ENSG00000163873 | -0.815170616 | 0.002137396 |
| ENSG00000258227 | -1.367053342 | 0.002155825 |
| ENSG00000080166 | -1.821420839 | 0.002594732 |
| ENSG00000106366 | -1.880860706 | 0.002514378 |
| ENSG00000157017 | -1.000129846 | 0.002638015 |
| ENSG00000171241 | -1.329670105 | 0.002432021 |
| ENSG00000181649 | -1.770052873 | 0.002582505 |
| ENSG00000197375 | -0.767143544 | 0.00246671  |
| ENSG00000109534 | -0.821870473 | 0.002660799 |
| ENSG00000131127 | -0.792439469 | 0.003222024 |
| ENSG00000143006 | -1.382965216 | 0.003175756 |

|                 |              |             |
|-----------------|--------------|-------------|
| ENSG00000160818 | -0.932600235 | 0.003146832 |
| ENSG00000173826 | -1.31502267  | 0.002735158 |
| ENSG00000184009 | -0.840130387 | 0.002835224 |
| ENSG00000215252 | -0.74213865  | 0.00294548  |
| ENSG00000239672 | -0.890333483 | 0.003264736 |
| ENSG00000174429 | -1.409162925 | 0.003353529 |
| ENSG00000140403 | -1.051067585 | 0.003484327 |
| ENSG00000108846 | -1.617720454 | 0.003772917 |
| ENSG00000119121 | -0.881795448 | 0.003672338 |
| ENSG00000140563 | -1.470329502 | 0.003843803 |
| ENSG00000142871 | -1.442922839 | 0.003701421 |
| ENSG00000103175 | -0.851479474 | 0.004356255 |
| ENSG00000108342 | -2.19484782  | 0.004430251 |
| ENSG00000149300 | -1.467070943 | 0.004149242 |
| ENSG00000161647 | -1.028058669 | 0.004515229 |
| ENSG00000167634 | -1.21803393  | 0.004005208 |
| ENSG00000172020 | -1.237687757 | 0.004416029 |
| ENSG00000172071 | -0.900048908 | 0.004234985 |
| ENSG00000083454 | -1.191452097 | 0.004658286 |
| ENSG00000137709 | -0.800013066 | 0.004695437 |
| ENSG00000140450 | -1.063249286 | 0.004686897 |
| ENSG00000106258 | -1.024822595 | 0.005016107 |
| ENSG00000141655 | -0.992423061 | 0.004937616 |
| ENSG00000156140 | -0.905557609 | 0.004995812 |
| ENSG00000148154 | -0.700239934 | 0.005216136 |
| ENSG00000164761 | -1.695190715 | 0.005225797 |
| ENSG00000178381 | -0.778624364 | 0.005173676 |
| ENSG00000049449 | -0.947162077 | 0.005644812 |
| ENSG00000118193 | -0.846823029 | 0.005628422 |
| ENSG00000119285 | -0.714522192 | 0.00545382  |
| ENSG00000163584 | -0.961259238 | 0.005679052 |
| ENSG00000164611 | -1.52965133  | 0.00579318  |
| ENSG00000184205 | -1.026051288 | 0.005279386 |
| ENSG00000085465 | -1.030396218 | 0.005862897 |
| ENSG00000141378 | -0.900622511 | 0.00618612  |
| ENSG00000021852 | -1.441004351 | 0.006540671 |
| ENSG00000055955 | -0.970797748 | 0.006828266 |
| ENSG00000091127 | -0.852624721 | 0.00736663  |
| ENSG00000120694 | -0.762240768 | 0.006804732 |
| ENSG00000144802 | -0.8176701   | 0.007633833 |
| ENSG00000157119 | -0.839487248 | 0.006339701 |
| ENSG00000163975 | -0.921932392 | 0.006838546 |
| ENSG00000173320 | -0.860198651 | 0.006548968 |
| ENSG00000179165 | -1.129063625 | 0.007508659 |
| ENSG00000180525 | -1.106121824 | 0.007646921 |
| ENSG00000185483 | -0.710899201 | 0.006438191 |
| ENSG00000196872 | -0.932796096 | 0.007186908 |
| ENSG00000197213 | -0.730622421 | 0.008015375 |
| ENSG00000244623 | -2.229507314 | 0.008383172 |
| ENSG00000048462 | -0.717370058 | 0.008480855 |
| ENSG00000188517 | -1.177418287 | 0.008496731 |
| ENSG00000168209 | -1.358286363 | 0.008808175 |

|                 |              |             |
|-----------------|--------------|-------------|
| ENSG00000175264 | -1.073381636 | 0.008839215 |
| ENSG00000184254 | -1.156937446 | 0.00881479  |
| ENSG00000213988 | -1.254993975 | 0.008950735 |
| ENSG00000067082 | -0.826502819 | 0.009071757 |
| ENSG00000115902 | -0.998039131 | 0.009295279 |
| ENSG00000147588 | -1.017339135 | 0.009358436 |
| ENSG00000153922 | -0.793322038 | 0.009283209 |
| ENSG00000071282 | -0.753923362 | 0.009722753 |
| ENSG00000100889 | -1.089709958 | 0.009688149 |
| ENSG00000108821 | -0.980130282 | 0.009872971 |
| ENSG00000248713 | -1.195890107 | 0.00997692  |
| ENSG00000011422 | -0.954549278 | 0.012453972 |
| ENSG00000041982 | -1.321881962 | 0.011979727 |
| ENSG00000113070 | -0.809113786 | 0.012555861 |
| ENSG00000124225 | -0.769641727 | 0.011347766 |
| ENSG00000134668 | -1.275641162 | 0.012041177 |
| ENSG00000141314 | -1.114844333 | 0.012463211 |
| ENSG00000143514 | -0.797308605 | 0.011426404 |
| ENSG00000159166 | -1.031210062 | 0.01082126  |
| ENSG00000166012 | -0.827523028 | 0.011056388 |
| ENSG00000168386 | -0.723761007 | 0.011228973 |
| ENSG00000170561 | -1.340320044 | 0.012337429 |
| ENSG00000171773 | -1.381569806 | 0.012391597 |
| ENSG00000174576 | -1.680621817 | 0.010722651 |
| ENSG00000175894 | -1.39922638  | 0.01125084  |
| ENSG00000182718 | -0.701633114 | 0.011388071 |
| ENSG00000189120 | -1.903583817 | 0.011296842 |
| ENSG00000118985 | -1.141349485 | 0.013584045 |
| ENSG00000144821 | -0.867697306 | 0.01344876  |
| ENSG00000163938 | -0.758495221 | 0.013253934 |
| ENSG00000170961 | -0.858439819 | 0.013562591 |
| ENSG00000256618 | -0.960149245 | 0.013387315 |
| ENSG00000171551 | -1.632634521 | 0.01384253  |
| ENSG00000196083 | -0.92681404  | 0.014141469 |
| ENSG00000115541 | -0.722213861 | 0.015324845 |
| ENSG00000131652 | -0.912014312 | 0.015178508 |
| ENSG00000165732 | -0.709568797 | 0.015475224 |
| ENSG00000172785 | -0.768432617 | 0.01547111  |
| ENSG00000197893 | -0.797987367 | 0.015860055 |
| ENSG00000171476 | -1.065272664 | 0.015953705 |
| ENSG00000166268 | -1.397781189 | 0.01598527  |
| ENSG00000139835 | -1.16994372  | 0.01618297  |
| ENSG00000136997 | -1.053418698 | 0.016341381 |
| ENSG00000183578 | -0.967568562 | 0.016506551 |
| ENSG00000075073 | -0.949370345 | 0.018261302 |
| ENSG00000100003 | -0.769100559 | 0.017799309 |
| ENSG00000102104 | -1.048124771 | 0.01755383  |
| ENSG00000102901 | -0.735484654 | 0.017253626 |
| ENSG00000113916 | -0.858878357 | 0.019141778 |
| ENSG00000118557 | -0.75893106  | 0.018390652 |
| ENSG00000139629 | -0.990267621 | 0.018687203 |
| ENSG00000143320 | -0.795653557 | 0.018065808 |

|                 |              |             |
|-----------------|--------------|-------------|
| ENSG00000148798 | -1.684830876 | 0.018998283 |
| ENSG00000155890 | -1.013328187 | 0.018031359 |
| ENSG00000171121 | -0.894780124 | 0.017396813 |
| ENSG00000197410 | -0.890466636 | 0.01893717  |
| ENSG00000037897 | -0.829666335 | 0.01932832  |
| ENSG00000140798 | -1.257791395 | 0.020205936 |
| ENSG00000123342 | -0.865088156 | 0.020482458 |
| ENSG00000127129 | -1.695710725 | 0.020474433 |
| ENSG00000243709 | -1.811246386 | 0.02050464  |
| ENSG00000100312 | -1.382305861 | 0.02224815  |
| ENSG00000101251 | -1.922695005 | 0.021319821 |
| ENSG00000106868 | -0.710063603 | 0.022939072 |
| ENSG00000122644 | -0.845560988 | 0.021243238 |
| ENSG00000124216 | -0.861108939 | 0.02307002  |
| ENSG00000134259 | -0.712446668 | 0.021352327 |
| ENSG00000143494 | -0.770827467 | 0.022072563 |
| ENSG00000163191 | -0.750212984 | 0.021649785 |
| ENSG00000175766 | -1.095566361 | 0.023131879 |
| ENSG00000178734 | -1.022599277 | 0.022315556 |
| ENSG00000197561 | -1.251110872 | 0.021115385 |
| ENSG00000253320 | -0.941996327 | 0.021326123 |
| ENSG00000186190 | -1.240150898 | 0.02331987  |
| ENSG00000183324 | -1.222235377 | 0.023646518 |
| ENSG00000047662 | -0.955031743 | 0.02382527  |
| ENSG00000135437 | -1.153921057 | 0.023926038 |
| ENSG00000158816 | -0.711664221 | 0.023956013 |
| ENSG00000147174 | -0.873245413 | 0.024403496 |
| ENSG00000154359 | -0.715016369 | 0.025152197 |
| ENSG00000155761 | -0.826348036 | 0.025290819 |
| ENSG00000196517 | -1.063552659 | 0.025324796 |
| ENSG00000170545 | -0.715981213 | 0.025835696 |
| ENSG00000173124 | -2.152981471 | 0.026044127 |
| ENSG00000101680 | -0.820867574 | 0.026201343 |
| ENSG00000105610 | -0.810272523 | 0.026415756 |
| ENSG00000163389 | -0.722884689 | 0.026527389 |
| ENSG00000127507 | -0.76020545  | 0.027084593 |
| ENSG00000137558 | -0.992491348 | 0.026684091 |
| ENSG00000159388 | -0.770668473 | 0.027072534 |
| ENSG00000071539 | -0.895062294 | 0.027484577 |
| ENSG00000122641 | -0.871057705 | 0.027465989 |
| ENSG00000266258 | -1.16101567  | 0.028042671 |
| ENSG00000069696 | -1.095967198 | 0.028330438 |
| ENSG00000092621 | -0.77373715  | 0.028205111 |
| ENSG00000111186 | -0.842500648 | 0.028609285 |
| ENSG00000146955 | -0.710832089 | 0.028286554 |
| ENSG00000171587 | -0.702334094 | 0.028726801 |
| ENSG00000198805 | -0.801003231 | 0.028969372 |
| ENSG00000088726 | -0.782684561 | 0.029338725 |
| ENSG00000162772 | -0.929807896 | 0.029585358 |
| ENSG00000179841 | -0.952345291 | 0.029446884 |
| ENSG00000182308 | -0.820897884 | 0.029678303 |
| ENSG00000115221 | -0.749412601 | 0.030082946 |

|                 |              |             |
|-----------------|--------------|-------------|
| ENSG00000184697 | -1.743729616 | 0.02975076  |
| ENSG00000114013 | -0.926994183 | 0.03044661  |
| ENSG00000160282 | -1.029139684 | 0.030745557 |
| ENSG00000105173 | -0.733017204 | 0.031253521 |
| ENSG00000183117 | -1.034226547 | 0.031231588 |
| ENSG00000092529 | -0.776748467 | 0.031784229 |
| ENSG00000158296 | -0.91980045  | 0.031789458 |
| ENSG00000163817 | -1.014456717 | 0.032957216 |
| ENSG00000181433 | -1.314139431 | 0.033069079 |
| ENSG00000050628 | -1.197572581 | 0.033523116 |
| ENSG00000130649 | -0.918999784 | 0.035140686 |
| ENSG00000151789 | -0.713511143 | 0.03464841  |
| ENSG00000163638 | -0.725681651 | 0.034860153 |
| ENSG00000170522 | -0.863516107 | 0.034167939 |
| ENSG00000172156 | -0.937348453 | 0.033374378 |
| ENSG00000196950 | -0.713111197 | 0.035020771 |
| ENSG00000181026 | -0.842337189 | 0.035434243 |
| ENSG00000103154 | -0.897707362 | 0.040906924 |
| ENSG00000107105 | -1.373397852 | 0.041189784 |
| ENSG00000112494 | -2.200510123 | 0.040830539 |
| ENSG00000112559 | -0.722950033 | 0.039934276 |
| ENSG00000114529 | -0.895453473 | 0.039905517 |
| ENSG00000120937 | -1.73760142  | 0.036741678 |
| ENSG00000125931 | -1.127427191 | 0.037847507 |
| ENSG00000139155 | -0.777025669 | 0.035900795 |
| ENSG00000143867 | -1.025474691 | 0.040506564 |
| ENSG00000144550 | -0.753571513 | 0.038459702 |
| ENSG00000167767 | -1.522961424 | 0.036147245 |
| ENSG00000172482 | -1.075938525 | 0.040619787 |
| ENSG00000221819 | -1.30147832  | 0.038398443 |
| ENSG00000241322 | -0.964871953 | 0.039532095 |
| ENSG00000222005 | -1.031887021 | 0.041930677 |
| ENSG00000086570 | -0.841006149 | 0.042037263 |
| ENSG00000157315 | -1.211992919 | 0.04205383  |
| ENSG00000214827 | -0.723477349 | 0.042331599 |
| ENSG00000179388 | -1.035883521 | 0.043359073 |
| ENSG00000103489 | -0.828728804 | 0.044005725 |
| ENSG00000106211 | -0.999925343 | 0.044536215 |
| ENSG00000115138 | -0.794359858 | 0.045027138 |
| ENSG00000216588 | -0.971543147 | 0.045013087 |
| ENSG00000171495 | -1.475510824 | 0.045895281 |
| ENSG00000102802 | -0.725768909 | 0.046829957 |
| ENSG00000177103 | -0.819098614 | 0.04679255  |
| ENSG00000216895 | -1.072213373 | 0.046738299 |
| ENSG00000145757 | -1.241982642 | 0.048221699 |
| ENSG00000139890 | -1.152815745 | 0.04936772  |
| ENSG00000137648 | -1.119332615 | 0.049708653 |
| ENSG00000196196 | -0.719057877 | 0.049952231 |

**Table S6** Primer information

| Gene           | Forward                       | Reverse                    |
|----------------|-------------------------------|----------------------------|
| <i>Slc19a2</i> | 5'-TTGACCGAGAGACAGGTCTTCAA-3' | 5'-GACAGGCTTGTAACGGAGGT-3' |

|                  |                               |                                 |
|------------------|-------------------------------|---------------------------------|
| <i>Lefty1</i>    | 5'-TAACAGTGAGCTGGTGCAGG-3'    | 5'-TGGATGGACACGAGCCTAGA-3'      |
| <i>Bpifb3</i>    | 5'-TACTGACGGGTTTCTGGCGG-3'    | 5'-ACTAGGGAGTTCTGGATGGCTTTG-3'  |
| <i>Ecel1</i>     | 5'-GGCTATGATGACTGGGGAGG-3'    | 5'-CCTCCCATGTCTGCGATGTT-3'      |
| <i>Trim42</i>    | 5'-GCCAAGTTCAAAGCAGTCCG-3'    | 5'-TGGCTCGCAGTTTGAGGAAT-3'      |
| <i>Krt80</i>     | 5'-CAGCCACCACTACGAGACAT-3'    | 5'-TCAGCATCCAGGTCCCTTCTTC-3'    |
| <i>Rec114</i>    | 5'-TCGCCCACATGGAAGGTTTTT-3'   | 5'-CCTGGACGGTGACATACTGG-3'      |
| <i>Mpp3</i>      | 5'-CGCCGAGGGGAGGTCATA-3'      | 5'-CAAACCCGAGTCTTCGGACA-3'      |
| <i>Nxn11</i>     | 5'-ATGTGTCCCAGGACCCTACA-3'    | 5'-GCCCCGAGGTCTCTCCTCA-3'       |
| <i>Abcc12</i>    | 5'-TTACAGAAAGGGGTCGTGGC-3'    | 5'-CCGCTCCCCAATCTCAGTC-3'       |
| <i>Clec5a</i>    | 5'-AACCCTAATGTGCAGAATGTCTC-3' | 5'-ATCCCAGTTGTTGGGACAGG-3'      |
| <i>Tnfrsf11b</i> | 5'-CTCACTTGGCCTCCTGCTAA-3'    | 5'-CTTCGCACAGGGTGACATCTAT-3'    |
| <i>Eif4e1b</i>   | 5'-TCTACAACCGGGCCAAAGAG-3'    | 5'-AGACTCCATGTTCCACTGAGAT-3'    |
| <i>Rem2</i>      | 5'-CCTTGACACCGACATGGACG-3'    | 5'-TGTCGTATCGGCTTCTGGTGT-3'     |
| <i>Lad1</i>      | 5'-GCAAGGATGAAGATGCAGACATA-3' | 5'-TGACGGATTCTGACCTCTGGA-3'     |
| <i>Npas4</i>     | 5'-CTGGGCCATTCTATGGTGGA-3'    | 5'-GTTTGTTGCCTGCACTCTGG-3'      |
| <i>Kcne4</i>     | 5'-CAAACCTGTCAGCCTTTGATCCC-3' | 5'-GAGGCTGGACTTCTTCTCCC-3'      |
| <i>Edn2</i>      | 5'-TCTCCAAAAGCTGAGGGACATC-3'  | 5'-TCCCAGTAGCTGCCCATTTC-3'      |
| <i>Abcc3</i>     | 5'-AACTGAGATCCCAAGACCAGC-3'   | 5'-GTCAGGTTGGAGTCCCAGAA-3'      |
| <i>Myrf1</i>     | 5'-CGCTCAGATGACACAGGGAT-3'    | 5'-GCTTTCCTTTGGTAACGCCC-3'      |
| <i>Agxt</i>      | 5'-TGCAGGCATCGACATCTTGT-3'    | 5'-TGGGGAATAGAAAAGAACACTCTGG-3' |
| <i>Tspan1</i>    | 5'-GTGCAGCAGATCCCGTTCAG-3'    | 5'-GGCTGCACCACAGAGAAAGATGA-3'   |
| <i>Maff</i>      | 5'-TTGGGACCACCAGCGACAG-3'     | 5'-GCTCGCGCTTGACCTTCAG-3'       |
| <i>Hopx</i>      | 5'-GCTCTCCATCCTTAGCCAGA-3'    | 5'-TGCTTAAACCATTCTGCGTCT-3'     |
| <i>Spata9</i>    | 5'-GGTCAAAATGGCCCTTGCTT-3'    | 5'-GAACCTTTTCTGACCTGTATGC-3'    |
| <i>Dmrtb1</i>    | 5'-TTCGCCGACTACGGGCATC-3'     | 5'-AGTAGGTTGGCTGCAGGTCT-3'      |
| <i>Slc6a20</i>   | 5'-GTGTATGGGCTGAGGAGATTTG-3'  | 5'-CGATTCTGATGAAAGTCCCC-3'      |
| <i>Sphk1</i>     | 5'-CAGCCCCGAGACTCAAAGAA-3'    | 5'-GGGGACAGTCTGCTGGTTG-3'       |
| <i>Tmprss4</i>   | 5'-AGATAGTGGCAGGTGGTAGC-3'    | 5'-CACTGTCTGGCTCCATATTGC-3'     |
| <i>Fosb</i>      | 5'-ACCCCGAGAAGAAACACTTACC-3'  | 5'-ACCCTGGCAAATCTCTCACC-3'      |
| <i>Sell12</i>    | 5'-CTTGGGGATTGCACAGGACA-3'    | 5'-CAGCCATTTCATTTCGTGGT-3'      |
| <i>Drd4</i>      | 5'-CTTTGTCTACTCCGAGGGTGG-3'   | 5'-ACTGACCCTGCTGGTTGTAG-3'      |
| <i>Abra</i>      | 5'-CTACGGAGGGGACATGGAGG-3'    | 5'-TGAGTATCTGTTTGCCTGGGAGTG-3'  |
| <i>Nfic</i>      | 5'-TTGTGGGATTAGGACGGAGG-3'    | 5'-CAGGGGACTTCTCACTCGTC-3'      |
| 18s              | 5'-ACCGCAGCTAGGAATAATGGA-3'   | 5'-GCCTCAGTTCCGAAAACCA-3'       |

**Table S7** *Nfic* shRNA information

| shRNA               | Forward                     | Reverse                     |
|---------------------|-----------------------------|-----------------------------|
| <i>Nfic</i> shRNA#1 | 5'-GGTCATGGTCATCCTGTTCAA-3' | 5'-TTGAACAGGATGACCATGACC-3' |
| <i>Nfic</i> shRNA#2 | 5'-GAGAAGGACTCTACCCAGTAC-3' | 5'-GTACTGGGTAGAGTCCTTCTC-3' |

**Table S8** The CT value of qRT-PCR assay

| Gene           | CT value of pLko.1 | CT value of <i>Nfic</i> shRNA |
|----------------|--------------------|-------------------------------|
| 18S            | 11.08              | 10.70                         |
| <i>Slc19a2</i> | 29.60              | 28.65                         |
| <i>Lefty1</i>  | NA                 | NA                            |
| <i>Bpifb3</i>  | NA                 | NA                            |
| <i>Ecel1</i>   | 37.19*             | 37.51*                        |
| <i>Trim42</i>  | NA                 | NA                            |
| <i>Krt80</i>   | 29.78              | 28.67                         |
| <i>Rec114</i>  | 32.53              | 32.26                         |
| <i>Mpp3</i>    | 39.84*             | NA                            |
| <i>Nxn11</i>   | 36.29*             | 36.53*                        |

|                  |        |        |
|------------------|--------|--------|
| <i>Abcc12</i>    | 36.55* | 38.29* |
| <i>Clec5a</i>    | NA     | NA     |
| <i>Tnfrsf11b</i> | 27.50  | 25.98  |
| <i>Eif4e1b</i>   | NA     | NA     |
| <i>Rem2</i>      | 36.30* | 35.90* |
| <i>Lad1</i>      | 38.1*  | NA     |
| <i>Npas4</i>     | 32.39  | 31.77  |
| <i>Kcne4</i>     | 36.75* | 35.86* |
| <i>Edn2</i>      | 36.44* | 35.65* |
| <i>Abcc3</i>     | 29.98  | 28.88  |
| <i>Myrfl</i>     | 36.43* | 36.12* |
| <i>Agxt</i>      | NA     | NA     |
| <i>Tspan1</i>    | 33.92  | 33.73  |
| <i>Maff</i>      | 30.81  | 29.12  |
| <i>Hopx</i>      | 34.26  | 34.11  |
| <i>Spata9</i>    | 32.55  | 32.24  |
| <i>Dmrtb1</i>    | 34.55  | 34.09  |
| <i>Slc6a20</i>   | 36.87* | 36.13* |
| <i>Sphk1</i>     | 36.04* | 35.47* |
| <i>Tmprss4</i>   | 35.23* | 34.46  |
| <i>Fosb</i>      | 33.14  | 31.62  |
| <i>Sell12</i>    | 37.17* | 36.94* |
| <i>Drd4</i>      | 33.06  | 32.92  |
| <i>Abra</i>      | 33.40  | 33.35  |

---

\*: When the CT value is greater than 35, we regard it as NA.
