# Supplementary material for: Bioinformatics and Experimental Analyses Reveal NFIC as an Upstream Transcriptional Regulator for Ischemic Cardiomyopathy
Source: MDPI journal article supplement (doi:10.3390/genes13061051), 2022-06-13
Supplement: s1 [file s1]

A

Down-regulated

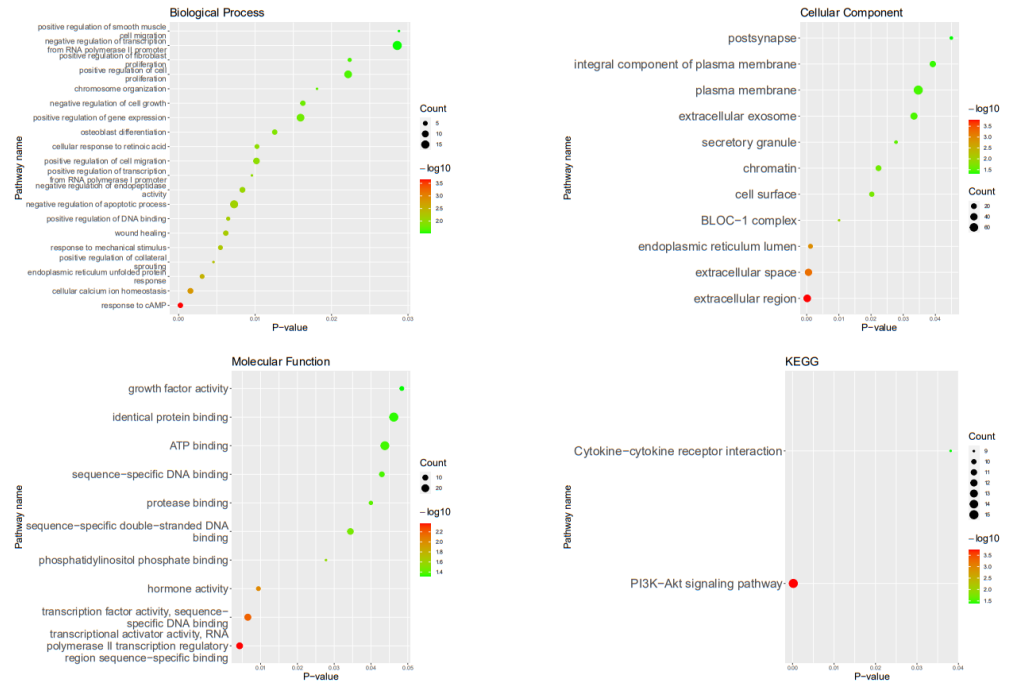

B

Up-regulated

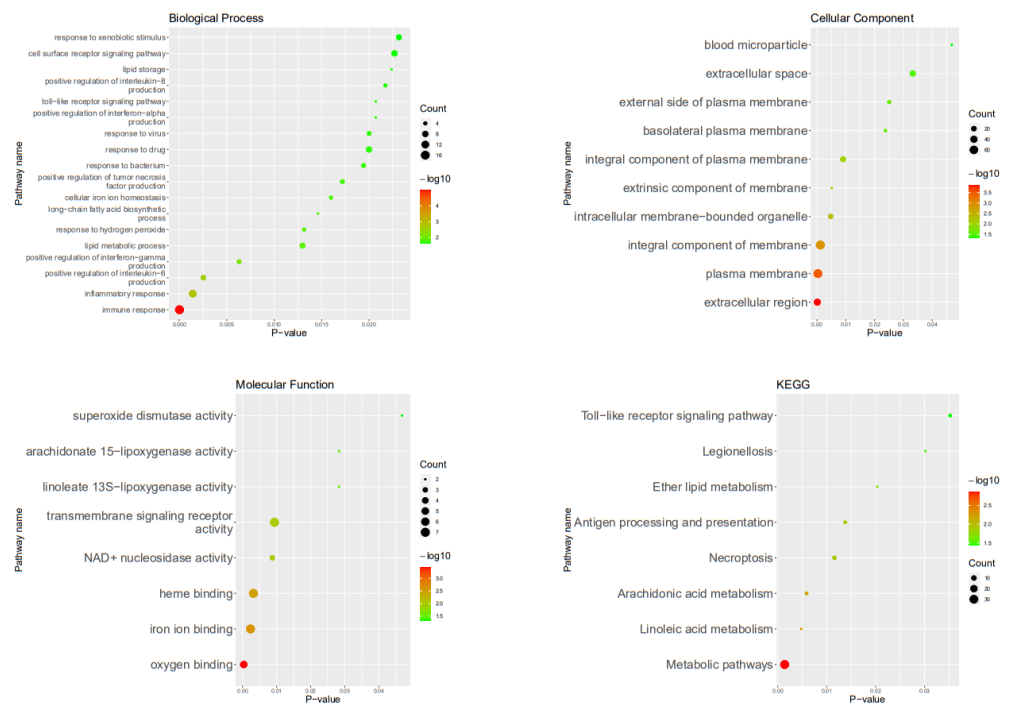

**Figure S1.** GO and KEGG analyses of DEGs with loose cutoff ( $p$  value  $< 0.05$  and  $|\log_2 FC| \geq 0.7$ ). (A) GO and KEGG analyses of down-regulated genes. (B) GO and KEGG analyses of up-regulated genes

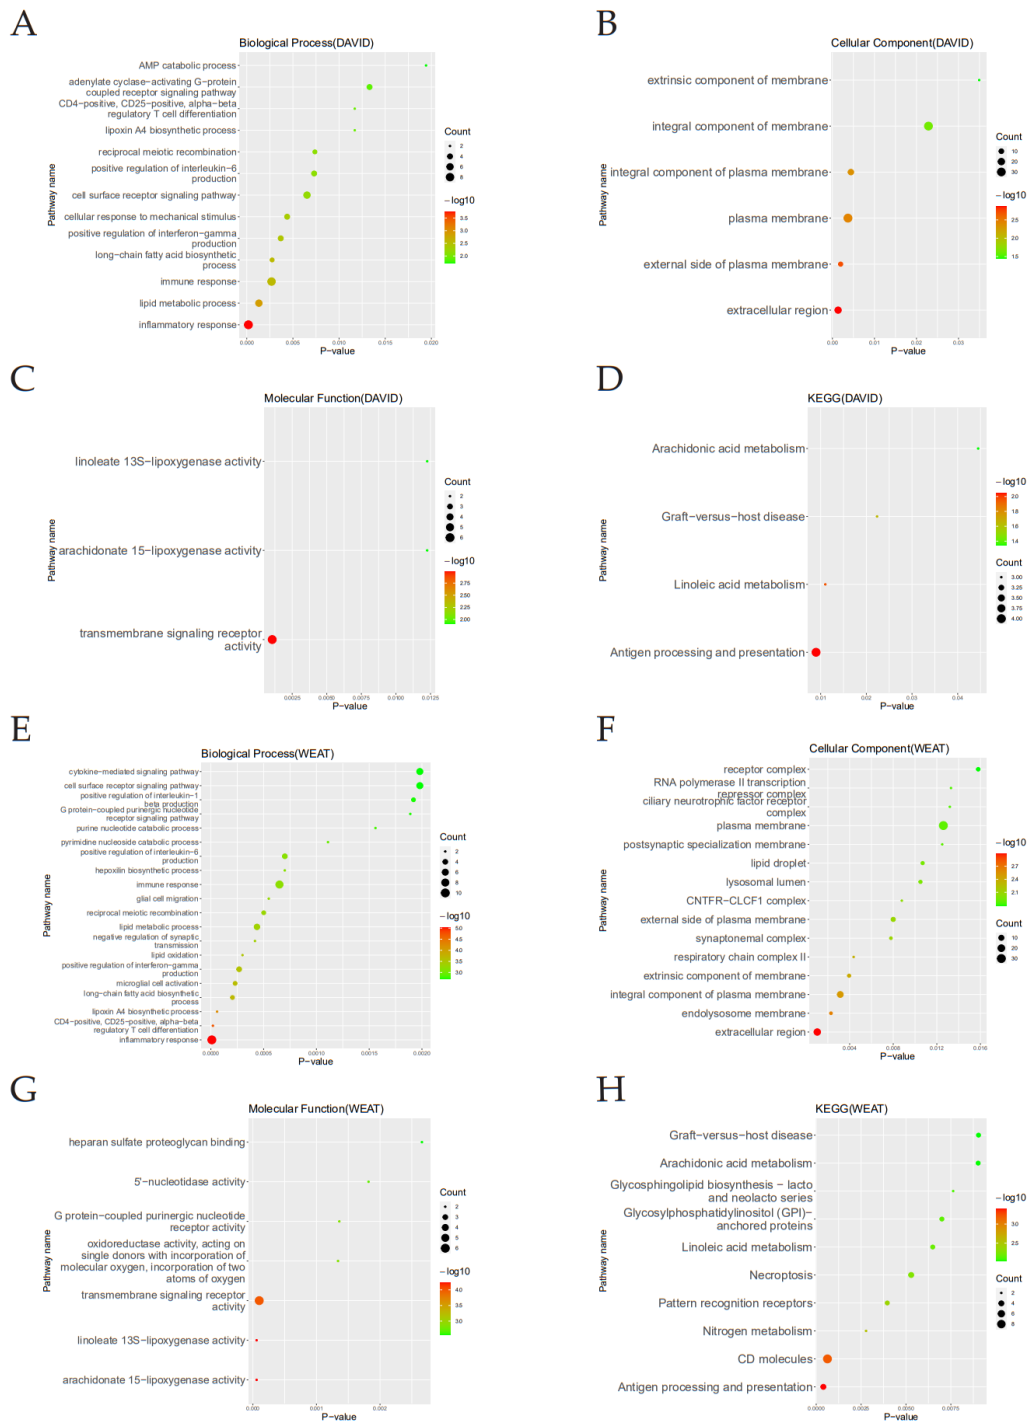

**Figure S2.** GO and KEGG analyses of up-regulated genes. (A-C) DAVID GO analyses of up-regulated genes. (D) DAVID KEGG analysis of up-regulated genes. (E-G) WEAT GO analyses of up-regulated genes. (H) WEAT KEGG analysis of up-regulated genes.

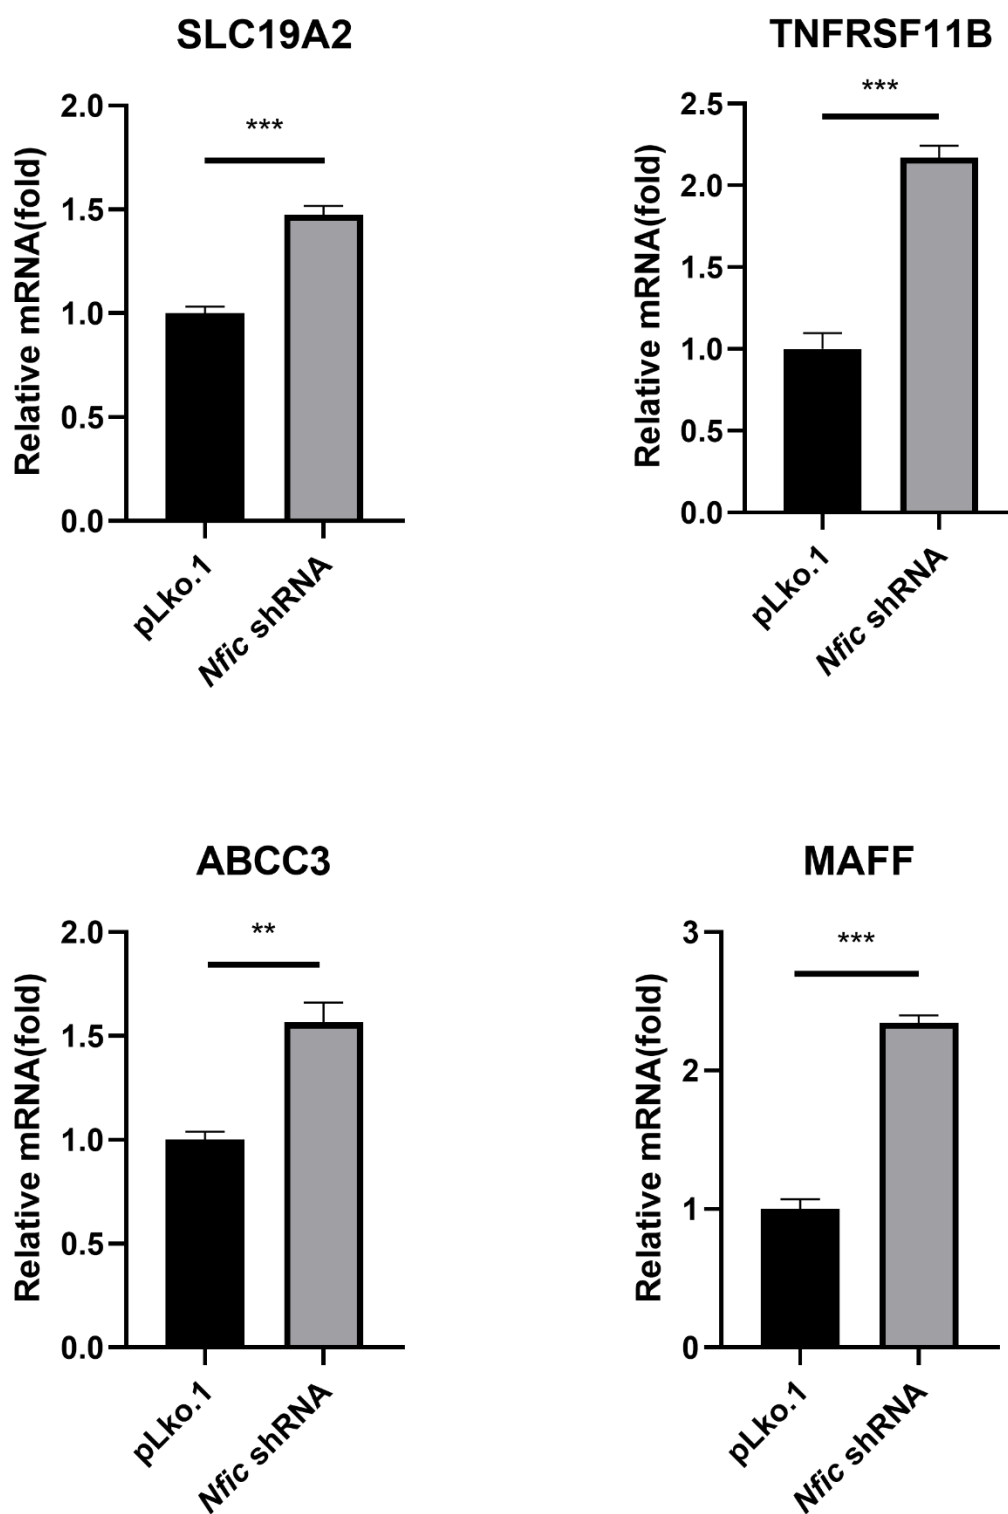

**Figure S3.** The mRNA expression level of predicted genes in *Nfic* knockdown H9C2 cells (n = 3 per group)
